# Supplementary material for: Association between Excessive Dietary Branched-Chain Amino Acids Intake and Hypertension Risk in Chinese Population
Source: MDPI journal article supplement (doi:10.3390/nu14132582), 2022-06-22
Supplement: s1 [file s1]

**Association between excessive dietary branched-chain amino acids intake and hypertension risk in Chinese population**

**No. of tables:** 4 tables and 3 figures

**Table S1.** Adjusted associations of BP with categorical variables of BCAAs based on quartiles in participants without antihypertensive treatment (n=7,761)

| Men (n=3,646)  |     |            |             |             |                 |                | Women (n=4,115) |       |            |             |             |                 | <i>P</i> -value for |             |
|----------------|-----|------------|-------------|-------------|-----------------|----------------|-----------------|-------|------------|-------------|-------------|-----------------|---------------------|-------------|
|                | n   | mean ± SD  | Coefficient | 95% CI      | <i>P</i> -value | R <sup>2</sup> |                 | n     | mean ± SD  | Coefficient | 95% CI      | <i>P</i> -value | R <sup>2</sup>      | interaction |
| SBP            |     |            |             |             |                 |                |                 |       |            |             |             |                 |                     |             |
| Ile (g/day)    |     |            |             |             |                 | 0.106          | Ile (g/day)     |       |            |             |             |                 | 0.191               | 0.004       |
| Q1 (<1.66)     | 905 | 121.2±15.2 |             | Ref         |                 |                | Q1 (<1.57)      | 1,027 | 118.6±16.9 |             | Ref         |                 |                     |             |
| Q2 (1.66-2.32) | 903 | 122.0±14.5 | 1.33        | -0.51, 3.16 | 0.157           |                | Q2 (1.57-2.15)  | 1,036 | 119.0±16.6 | 1.15        | -0.58, 2.87 | 0.193           |                     |             |
| Q3 (2.32-3.06) | 925 | 123.0±14.3 | 3.04        | 1.18, 4.89  | 0.001           |                | Q3 (2.15-2.87)  | 1,036 | 118.9±14.9 | 0.99        | -0.81, 2.79 | 0.281           |                     |             |
| Q4 (≥3.06)     | 913 | 126.1±15.3 | 7.16        | 5.18, 9.13  | <0.001          |                | Q4 (≥2.87)      | 1,016 | 121.7±16.6 | 4.11        | 2.18, 6.04  | <0.001          |                     |             |
| Leu (g/day)    |     |            |             |             |                 | 0.107          | Leu (g/day)     |       |            |             |             |                 | 0.190               | 0.004       |
| Q1 (<2.94)     | 900 | 121.3±15.3 |             | Ref         |                 |                | Q1 (<2.76)      | 1,014 | 118.5±17.0 |             | Ref         |                 |                     |             |
| Q2 (2.94-4.12) | 916 | 121.7±14.2 | 0.90        | -0.97, 2.76 | 0.346           |                | Q2 (2.76-3.82)  | 1,045 | 119.1±16.5 | 1.57        | -0.18, 3.32 | 0.078           |                     |             |
| Q3 (4.12-5.54) | 919 | 122.9±14.2 | 2.97        | 1.09, 4.85  | 0.002           |                | Q3 (3.82-5.15)  | 1,042 | 119.0±15.0 | 1.51        | -0.29, 3.30 | 0.100           |                     |             |
| Q4 (≥5.54)     | 911 | 126.3±15.4 | 7.01        | 5.02, 9.00  | <0.001          |                | Q4 (≥5.15)      | 1,014 | 121.6±16.5 | 3.98        | 2.08, 5.89  | <0.001          |                     |             |
| Val (g/day)    |     |            |             |             |                 | 0.102          | Val (g/day)     |       |            |             |             |                 | 0.191               | 0.017       |
| Q1 (<1.96)     | 907 | 121.3±15.0 |             | Ref         |                 |                | Q1 (<1.85)      | 1,020 | 118.4±16.7 |             | Ref         |                 |                     |             |
| Q2 (1.96-2.71) | 905 | 121.9±14.3 | 0.85        | -0.96, 2.65 | 0.357           |                | Q2 (1.85-2.52)  | 1,037 | 119.1±16.5 | 1.70        | -0.01, 3.40 | 0.051           |                     |             |
| Q3 (2.71-3.61) | 918 | 123.1±14.5 | 3.29        | 1.43, 5.16  | 0.001           |                | Q3 (2.52-3.37)  | 1,036 | 119.1±15.3 | 1.41        | -0.38, 3.20 | 0.122           |                     |             |
| Q4 (≥3.61)     | 916 | 126.0±15.4 | 6.42        | 4.45, 8.39  | <0.001          |                | Q4 (≥3.37)      | 1,022 | 121.6±16.6 | 4.27        | 2.36, 6.18  | <0.001          |                     |             |
| DBP            |     |            |             |             |                 |                |                 |       |            |             |             |                 |                     |             |
| Ile (g/day)    |     |            |             |             |                 | 0.042          | Ile (g/day)     |       |            |             |             |                 | 0.072               | 0.041       |
| Q1 (<1.66)     | 905 | 79.4±10.6  |             | Ref         |                 |                | Q1 (<1.57)      | 1,027 | 76.4±10.7  |             | Ref         |                 |                     |             |
| Q2 (1.66-2.32) | 903 | 79.2±9.5   | -0.26       | -1.55, 1.03 | 0.689           |                | Q2 (1.57-2.15)  | 1,036 | 76.8±10.0  | 0.83        | -0.35, 2.01 | 0.166           |                     |             |
| Q3 (2.32-3.06) | 925 | 80.8±10.0  | 0.80        | -0.51, 2.10 | 0.230           |                | Q3 (2.15-2.87)  | 1,036 | 76.8±10.0  | 0.36        | -0.86, 1.59 | 0.563           |                     |             |
| Q4 (≥3.06)     | 913 | 82.5±9.9   | 2.96        | 1.57, 4.35  | <0.001          |                | Q4 (≥2.87)      | 1,016 | 78.4±9.8   | 1.77        | 0.45, 3.09  | 0.009           |                     |             |
| Leu (g/day)    |     |            |             |             |                 | 0.040          | Leu (g/day)     |       |            |             |             |                 | 0.071               | 0.042       |

|                |     |           |       |             |        |       |                |       |           |      |             |       |       |       |
|----------------|-----|-----------|-------|-------------|--------|-------|----------------|-------|-----------|------|-------------|-------|-------|-------|
| Q1 (<2.94)     | 900 | 79.4±10.6 |       | Ref         |        |       | Q1 (<2.76)     | 1,014 | 76.5±10.7 |      | Ref         |       |       |       |
| Q2 (2.94-4.12) | 916 | 79.3±9.6  | -0.34 | -1.65, 0.97 | 0.607  |       | Q2 (2.76-3.82) | 1,045 | 76.7±10.0 | 0.87 | -0.32, 2.07 | 0.152 |       |       |
| Q3 (4.12-5.54) | 919 | 80.7±9.9  | 0.48  | -0.84, 1.80 | 0.474  |       | Q3 (3.82-5.15) | 1,042 | 77.0±9.9  | 0.53 | -0.70, 1.75 | 0.399 |       |       |
| Q4 (≥5.54)     | 911 | 82.5±10.0 | 2.65  | 1.25, 4.05  | <0.001 |       | Q4 (≥5.15)     | 1,014 | 78.4±9.9  | 1.39 | 0.09, 2.69  | 0.036 |       |       |
| Val (g/day)    |     |           |       |             |        | 0.038 | Val (g/day)    |       |           |      |             |       | 0.073 | 0.126 |
| Q1 (<1.96)     | 907 | 79.3±10.5 |       | Ref         |        |       | Q1 (<1.85)     | 1,020 | 76.4±10.6 |      | Ref         |       |       |       |
| Q2 (1.96-2.71) | 905 | 79.5±9.4  | 0.09  | -1.18, 1.35 | 0.893  |       | Q2 (1.85-2.52) | 1,037 | 76.8±10.1 | 0.99 | -0.17, 2.16 | 0.094 |       |       |
| Q3 (2.71-3.61) | 918 | 80.8±10.2 | 1.19  | -0.12, 2.50 | 0.075  |       | Q3 (2.52-3.37) | 1,036 | 77.0±9.9  | 0.62 | -0.61, 1.84 | 0.323 |       |       |
| Q4 (≥3.61)     | 916 | 82.3±10.0 | 2.67  | 1.29, 4.06  | <0.001 |       | Q4 (≥3.37)     | 1,022 | 78.4±10.0 | 1.94 | 0.63, 3.24  | 0.004 |       |       |

Regression models were adjusted for age, ethnicity, education, urban residents, diagnosed T2DM, physical activity, smoking, alcohol drinking, energy, carbohydrate, fat, protein, and salt intake. The interaction by gender was only estimated for BCAAs, not for any other confounder. **Abbreviations:** BP: blood pressure; BCAA: branched-chain amino acid; SD: standard deviation; 95% CI: 95% confidence interval; R<sup>2</sup>: coefficient of determination; SBP: systolic blood pressure; DBP: diastolic blood pressure; Ile: isoleucine; Leu: leucine; Val: valine.

**Table S2.** Adjusted associations of BP with categorical variables of BCAAs based on quartiles in participants without antihypertensive treatment (n=7,761)

| Men (n=3,646)  |     |            |             |             |                 |                | Women (n=4,115) |       |            |             |             |                 | <i>P</i> -value for interaction |                |
|----------------|-----|------------|-------------|-------------|-----------------|----------------|-----------------|-------|------------|-------------|-------------|-----------------|---------------------------------|----------------|
|                | n   | mean ± SD  | Coefficient | 95% CI      | <i>P</i> -value | R <sup>2</sup> |                 | n     | mean ± SD  | Coefficient | 95% CI      | <i>P</i> -value |                                 | R <sup>2</sup> |
| Change of SBP  |     |            |             |             |                 |                |                 |       |            |             |             |                 |                                 |                |
| Ile (g/day)    |     |            |             |             |                 | 0.071          | Ile (g/day)     |       |            |             |             |                 | 0.064                           | <0.001         |
| Q1 (<1.66)     | 905 | 4.36±15.4  |             | Ref         |                 |                | Q1 (<1.57)      | 1,027 | 6.50±16.36 |             | Ref         |                 |                                 |                |
| Q2 (1.66-2.32) | 903 | 5.33±14.9  | 1.24        | -0.68, 3.15 | 0.207           |                | Q2 (1.57-2.15)  | 1,036 | 5.65±16.10 | -0.41       | -2.25, 1.42 | 0.659           |                                 |                |
| Q3 (2.32-3.06) | 925 | 5.90±14.6  | 3.01        | 1.07, 4.95  | 0.002           |                | Q3 (2.15-2.87)  | 1,036 | 5.84±15.86 | -0.70       | -2.62, 1.22 | 0.477           |                                 |                |
| Q4 (≥3.06)     | 913 | 8.03±15.4  | 6.61        | 4.55, 8.67  | <0.001          |                | Q4 (≥2.87)      | 1,016 | 7.51±15.91 | 2.44        | 0.38, 4.50  | 0.020           |                                 |                |
| Leu (g/day)    |     |            |             |             |                 | 0.072          | Leu (g/day)     |       |            |             |             |                 | 0.062                           | <0.001         |
| Q1 (<2.94)     | 900 | 4.46±15.33 |             | Ref         |                 |                | Q1 (<2.76)      | 1,014 | 6.48±16.28 |             | Ref         |                 |                                 |                |
| Q2 (2.94-4.12) | 916 | 5.29±15.06 | 1.75        | -0.18, 3.69 | 0.076           |                | Q2 (2.76-3.82)  | 1,045 | 6.01±16.17 | 0.15        | -1.72, 2.01 | 0.876           |                                 |                |
| Q3 (4.12-5.54) | 919 | 5.49±14.29 | 2.90        | 0.94, 4.86  | 0.004           |                | Q3 (3.82-5.15)  | 1,042 | 5.50±15.93 | -0.27       | -2.19, 1.65 | 0.784           |                                 |                |
| Q4 (≥5.54)     | 911 | 8.39±15.45 | 6.89        | 4.82, 8.95  | <0.001          |                | Q4 (≥5.15)      | 1,014 | 7.53±15.85 | 2.33        | 0.30, 4.36  | 0.024           |                                 |                |
| Val (g/day)    |     |            |             |             |                 | 0.067          | Val (g/day)     |       |            |             |             |                 | 0.063                           | 0.001          |
| Q1 (<1.96)     | 907 | 4.25±15.28 |             | Ref         |                 |                | Q1 (<1.85)      | 1,020 | 6.32±16.11 |             | Ref         |                 |                                 |                |
| Q2 (1.96-2.71) | 905 | 5.31±14.69 | 1.16        | -0.72, 3.03 | 0.227           |                | Q2 (1.85-2.52)  | 1,037 | 5.74±16.15 | 0.05        | -1.77, 1.86 | 0.959           |                                 |                |
| Q3 (2.71-3.61) | 918 | 5.99±14.57 | 3.26        | 1.31, 5.21  | 0.001           |                | Q3 (2.52-3.37)  | 1,036 | 5.94±15.96 | 0.12        | -1.80, 2.03 | 0.906           |                                 |                |
| Q4 (≥3.61)     | 916 | 8.08±15.61 | 5.98        | 3.93, 8.02  | <0.001          |                | Q4 (≥3.37)      | 1,022 | 7.49±16.02 | 2.70        | 0.66, 4.73  | 0.009           |                                 |                |
| Change of DBP  |     |            |             |             |                 |                |                 |       |            |             |             |                 |                                 |                |
| Ile (g/day)    |     |            |             |             |                 | 0.044          | Ile (g/day)     |       |            |             |             |                 | 0.036                           | 0.063          |
| Q1 (<1.66)     | 905 | 3.40±10.94 |             | Ref         |                 |                | Q1 (<1.57)      | 1,027 | 3.21±11.24 |             | Ref         |                 |                                 |                |
| Q2 (1.66-2.32) | 903 | 3.33±10.22 | -0.14       | -1.53, 1.24 | 0.842           |                | Q2 (1.57-2.15)  | 1,036 | 2.83±10.96 | -0.05       | -1.34, 1.24 | 0.947           |                                 |                |
| Q3 (2.32-3.06) | 925 | 4.40±10.43 | 1.14        | -0.27, 2.54 | 0.112           |                | Q3 (2.15-2.87)  | 1,036 | 3.26±10.81 | -0.16       | -1.51, 1.19 | 0.814           |                                 |                |
| Q4 (≥3.06)     | 913 | 5.39±10.27 | 2.62        | 1.14, 4.11  | 0.001           |                | Q4 (≥2.87)      | 1,016 | 4.28±10.07 | 1.13        | -0.32, 2.57 | 0.126           |                                 |                |
| Leu (g/day)    |     |            |             |             |                 | 0.044          | Leu (g/day)     |       |            |             |             |                 | 0.036                           | 0.061          |

|                |     |            |      |             |        |       |                |       |            |       |             |       |       |       |
|----------------|-----|------------|------|-------------|--------|-------|----------------|-------|------------|-------|-------------|-------|-------|-------|
| Q1 (<2.94)     | 900 | 3.44±10.93 |      | Ref         |        |       | Q1 (<2.76)     | 1,014 | 3.25±11.23 |       | Ref         |       |       |       |
| Q2 (2.94-4.12) | 916 | 3.44±10.26 | 0.10 | -1.30, 1.50 | 0.892  |       | Q2 (2.76-3.82) | 1,045 | 2.94±11.13 | 0.08  | -1.22, 1.39 | 0.901 |       |       |
| Q3 (4.12-5.54) | 919 | 4.14±10.27 | 0.78 | -0.64, 2.20 | 0.280  |       | Q3 (3.82-5.15) | 1,042 | 3.09±10.59 | -0.24 | -1.58, 1.11 | 0.728 |       |       |
| Q4 (≥5.54)     | 911 | 5.52±10.40 | 2.63 | 1.14, 4.13  | 0.001  |       | Q4 (≥5.15)     | 1,014 | 4.32±10.13 | 1.03  | -0.39, 2.45 | 0.154 |       |       |
| Val (g/day)    |     |            |      |             |        | 0.043 | Val (g/day)    |       |            |       |             |       | 0.037 | 0.167 |
| Q1 (<1.96)     | 907 | 3.17±10.81 |      | Ref         |        |       | Q1 (<1.85)     | 1,020 | 3.09±11.09 |       | Ref         |       |       |       |
| Q2 (1.96-2.71) | 905 | 3.62±10.06 | 0.55 | -0.80, 1.91 | 0.424  |       | Q2 (1.85-2.52) | 1,037 | 2.83±11.03 | 0.15  | -1.12, 1.42 | 0.818 |       |       |
| Q3 (2.71-3.61) | 918 | 4.38±10.63 | 1.68 | 0.27, 3.08  | 0.019  |       | Q3 (2.52-3.37) | 1,036 | 3.28±10.76 | 0.29  | -1.05, 1.63 | 0.674 |       |       |
| Q4 (≥3.61)     | 916 | 5.36±10.36 | 2.67 | 1.19, 4.15  | <0.001 |       | Q4 (≥3.37)     | 1,022 | 4.39±10.19 | 1.60  | 0.18, 3.03  | 0.028 |       |       |

Regression models were adjusted for age, ethnicity, education, urban residents, diagnosed T2DM, physical activity, smoking, alcohol drinking, energy, carbohydrate, fat, protein, and salt intake. The interaction by gender was only estimated for BCAAs, not for any other confounder. **Abbreviations:** BP: blood pressure; BCAA: branched-chain amino acid; SD: standard deviation; 95% CI: 95% confidence interval; R<sup>2</sup>: coefficient of determination; SBP: systolic blood pressure; DBP: diastolic blood pressure; Ile: isoleucine; Leu: leucine; Val: valine.

**Table S3.** Probability of non-hypertension estimated using Kaplan-Meier method (n=8,491)

| Time (years) | No. of participants at risk | No. of participants diagnosed as hypertension | Probability of non-hypertension | SE    | 95%CI        |
|--------------|-----------------------------|-----------------------------------------------|---------------------------------|-------|--------------|
| Men          |                             |                                               |                                 |       |              |
| 2            | 3,995                       | 454                                           | 0.886                           | 0.005 | 0.877, 0.896 |
| 3            | 2,690                       | 78                                            | 0.861                           | 0.006 | 0.850, 0.872 |
| 5            | 2,505                       | 434                                           | 0.712                           | 0.008 | 0.696, 0.727 |
| 7            | 1,494                       | 189                                           | 0.622                           | 0.009 | 0.604, 0.640 |
| Women        |                             |                                               |                                 |       |              |
| 2            | 4,496                       | 426                                           | 0.905                           | 0.004 | 0.897, 0.914 |
| 3            | 3,069                       | 73                                            | 0.884                           | 0.005 | 0.874, 0.893 |
| 5            | 2,889                       | 410                                           | 0.758                           | 0.007 | 0.744, 0.772 |
| 7            | 1,884                       | 195                                           | 0.68                            | 0.008 | 0.664, 0.696 |

**Abbreviations:** SE: standard error; 95%CI: 95% confidence interval.

**Table S4.** Adjusted associations of hypertension incidence with categorical variables of BCAAs based on quartiles (n=8,491)

| Men (n=3,995)  |       |                   |      |            |                 | Women (n=4,496) |       |                   |      |            | <i>P</i> -value for |             |
|----------------|-------|-------------------|------|------------|-----------------|-----------------|-------|-------------------|------|------------|---------------------|-------------|
|                | n     | Cases (incidence) | HR   | 95% CI     | <i>P</i> -value |                 | n     | Cases (incidence) | HR   | 95% CI     | <i>P</i> -value     | interaction |
| Model 1        |       |                   |      |            |                 |                 |       |                   |      |            |                     |             |
| Ile (g/day)    |       |                   |      |            |                 | Ile (g/day)     |       |                   |      |            |                     | 0.416       |
| Q1 (<1.66)     | 1,001 | 272 (27.2)        |      | Ref        |                 | Q1 (<1.57)      | 1,132 | 257 (22.7)        |      | Ref        |                     |             |
| Q2 (1.66-2.32) | 994   | 230 (23.1)        | 0.84 | 0.71, 1.01 | 0.059           | Q2 (1.57-2.15)  | 1,119 | 246 (22.0)        | 1.00 | 0.84, 1.19 | 0.970               |             |
| Q3 (2.32-3.06) | 997   | 267 (26.8)        | 0.98 | 0.83, 1.16 | 0.788           | Q3 (2.15-2.87)  | 1,128 | 255 (22.6)        | 1.02 | 0.86, 1.21 | 0.829               |             |
| Q4 (≥3.06)     | 1,003 | 386 (38.5)        | 1.53 | 1.31, 1.79 | <0.001          | Q4 (≥2.87)      | 1,117 | 346 (31.0)        | 1.54 | 1.31, 1.81 | <0.001              |             |
| Leu (g/day)    |       |                   |      |            |                 | Leu (g/day)     |       |                   |      |            |                     | 0.566       |
| Q1 (<2.94)     | 998   | 272 (27.3)        |      | Ref        |                 | Q1 (<2.76)      | 1,118 | 259 (23.2)        |      | Ref        |                     |             |
| Q2 (2.94-4.12) | 1,004 | 238 (23.7)        | 0.87 | 0.73, 1.03 | 0.102           | Q2 (2.76-3.82)  | 1,127 | 241 (21.4)        | 0.92 | 0.78, 1.10 | 0.377               |             |
| Q3 (4.12-5.54) | 997   | 264 (26.5)        | 0.95 | 0.80, 1.13 | 0.547           | Q3 (3.82-5.15)  | 1,133 | 255 (22.5)        | 0.99 | 0.83, 1.18 | 0.890               |             |
| Q4 (≥5.54)     | 996   | 381 (38.3)        | 1.52 | 1.30, 1.78 | <0.001          | Q4 (≥5.15)      | 1,118 | 349 (31.2)        | 1.51 | 1.29, 1.78 | <0.001              |             |
| Val (g/day)    |       |                   |      |            |                 | Val (g/day)     |       |                   |      |            |                     | 0.803       |
| Q1 (<1.96)     | 999   | 263 (26.3)        |      | Ref        |                 | Q1 (<1.85)      | 1,122 | 250 (22.3)        |      | Ref        |                     |             |
| Q2 (1.96-2.71) | 1,000 | 237 (23.7)        | 0.89 | 0.74, 1.06 | 0.177           | Q2 (1.85-2.52)  | 1,123 | 236 (21.0)        | 0.97 | 0.81, 1.15 | 0.700               |             |
| Q3 (2.71-3.61) | 991   | 282 (28.5)        | 1.06 | 0.89, 1.25 | 0.537           | Q3 (2.52-3.37)  | 1,126 | 267 (23.7)        | 1.06 | 0.89, 1.26 | 0.536               |             |
| Q4 (≥3.61)     | 1,005 | 373 (37.1)        | 1.49 | 1.27, 1.74 | <0.001          | Q4 (≥3.37)      | 1,125 | 351 (31.2)        | 1.55 | 1.32, 1.83 | <0.001              |             |
| Model 2        |       |                   |      |            |                 |                 |       |                   |      |            |                     |             |
| Ile (g/day)    |       |                   |      |            |                 | Ile (g/day)     |       |                   |      |            |                     | 0.636       |
| Q1 (<1.66)     | 1,001 | 272 (27.2)        |      | Ref        |                 | Q1 (<1.57)      | 1,132 | 257 (22.7)        |      | Ref        |                     |             |
| Q2 (1.66-2.32) | 994   | 230 (23.1)        | 0.76 | 0.59, 0.98 | 0.031           | Q2 (1.57-2.15)  | 1,119 | 246 (22.0)        | 1.12 | 0.88, 1.43 | 0.356               |             |
| Q3 (2.32-3.06) | 997   | 267 (26.8)        | 0.77 | 0.61, 0.99 | 0.039           | Q3 (2.15-2.87)  | 1,128 | 255 (22.6)        | 1.00 | 0.78, 1.28 | 0.984               |             |
| Q4 (≥3.06)     | 1,003 | 386 (38.5)        | 1.35 | 1.09, 1.67 | 0.006           | Q4 (≥2.87)      | 1,117 | 346 (31.0)        | 1.48 | 1.18, 1.86 | 0.001               |             |
| Leu (g/day)    |       |                   |      |            |                 | Leu (g/day)     |       |                   |      |            |                     | 0.726       |

|                |       |            |      |            |       |                |       |            |      |            |        |
|----------------|-------|------------|------|------------|-------|----------------|-------|------------|------|------------|--------|
| Q1 (<2.94)     | 998   | 272 (27.3) |      | Ref        |       | Q1 (<2.76)     | 1,118 | 259 (23.2) |      | Ref        |        |
| Q2 (2.94-4.12) | 1,004 | 238 (23.7) | 0.78 | 0.60, 1.01 | 0.055 | Q2 (2.76-3.82) | 1,127 | 241 (21.4) | 0.98 | 0.76, 1.26 | 0.858  |
| Q3 (4.12-5.54) | 997   | 264 (26.5) | 0.76 | 0.59, 0.98 | 0.031 | Q3 (3.82-5.15) | 1,133 | 255 (22.5) | 0.98 | 0.77, 1.26 | 0.879  |
| Q4 (≥5.54)     | 996   | 381 (38.3) | 1.31 | 1.05, 1.64 | 0.016 | Q4 (≥5.15)     | 1,118 | 349 (31.2) | 1.41 | 1.12, 1.77 | 0.003  |
| Val (g/day)    |       |            |      |            |       | Val (g/day)    |       |            |      |            | 0.918  |
| Q1 (<1.96)     | 999   | 263 (26.3) |      | Ref        |       | Q1 (<1.85)     | 1,122 | 250 (22.3) |      | Ref        |        |
| Q2 (1.96-2.71) | 1,000 | 237 (23.7) | 0.84 | 0.65, 1.07 | 0.162 | Q2 (1.85-2.52) | 1,123 | 236 (21.0) | 1.03 | 0.80, 1.32 | 0.826  |
| Q3 (2.71-3.61) | 991   | 282 (28.5) | 0.91 | 0.72, 1.16 | 0.459 | Q3 (2.52-3.37) | 1,126 | 267 (23.7) | 1.08 | 0.84, 1.38 | 0.563  |
| Q4 (≥3.61)     | 1,005 | 373 (37.1) | 1.35 | 1.08, 1.68 | 0.008 | Q4 (≥3.37)     | 1,125 | 351 (31.2) | 1.51 | 1.20, 1.90 | <0.001 |
|                |       |            |      |            |       | Model 3        |       |            |      |            |        |
| Ile (g/day)    |       |            |      |            |       | Ile (g/day)    |       |            |      |            | 0.788  |
| Q1 (<1.66)     | 1,001 | 272 (27.2) |      | Ref        |       | Q1 (<1.57)     | 1,132 | 257 (22.7) |      | Ref        |        |
| Q2 (1.66-2.32) | 994   | 230 (23.1) | 0.80 | 0.61, 1.03 | 0.085 | Q2 (1.57-2.15) | 1,119 | 246 (22.0) | 1.18 | 0.92, 1.52 | 0.195  |
| Q3 (2.32-3.06) | 997   | 267 (26.8) | 0.83 | 0.64, 1.07 | 0.141 | Q3 (2.15-2.87) | 1,128 | 255 (22.6) | 1.08 | 0.83, 1.41 | 0.556  |
| Q4 (≥3.06)     | 1,003 | 386 (38.5) | 1.54 | 1.20, 1.97 | 0.001 | Q4 (≥2.87)     | 1,117 | 346 (31.0) | 1.66 | 1.27, 2.16 | <0.001 |
| Leu (g/day)    |       |            |      |            |       | Leu (g/day)    |       |            |      |            | 0.873  |
| Q1 (<2.94)     | 998   | 272 (27.3) |      | Ref        |       | Q1 (<2.76)     | 1,118 | 259 (23.2) |      | Ref        |        |
| Q2 (2.94-4.12) | 1,004 | 238 (23.7) | 0.82 | 0.63, 1.07 | 0.143 | Q2 (2.76-3.82) | 1,127 | 241 (21.4) | 1.04 | 0.80, 1.34 | 0.790  |
| Q3 (4.12-5.54) | 997   | 264 (26.5) | 0.82 | 0.63, 1.06 | 0.125 | Q3 (3.82-5.15) | 1,133 | 255 (22.5) | 1.05 | 0.81, 1.37 | 0.706  |
| Q4 (≥5.54)     | 996   | 381 (38.3) | 1.47 | 1.14, 1.89 | 0.003 | Q4 (≥5.15)     | 1,118 | 349 (31.2) | 1.56 | 1.20, 2.02 | 0.001  |
| Val (g/day)    |       |            |      |            |       | Val (g/day)    |       |            |      |            | 0.750  |
| Q1 (<1.96)     | 999   | 263 (26.3) |      | Ref        |       | Q1 (<1.85)     | 1,122 | 250 (22.3) |      | Ref        |        |
| Q2 (1.96-2.71) | 1,000 | 237 (23.7) | 0.88 | 0.68, 1.13 | 0.320 | Q2 (1.85-2.52) | 1,123 | 236 (21.0) | 1.08 | 0.84, 1.40 | 0.548  |
| Q3 (2.71-3.61) | 991   | 282 (28.5) | 0.97 | 0.75, 1.25 | 0.802 | Q3 (2.52-3.37) | 1,126 | 267 (23.7) | 1.17 | 0.90, 1.52 | 0.235  |
| Q4 (≥3.61)     | 1,005 | 373 (37.1) | 1.50 | 1.17, 1.92 | 0.001 | Q4 (≥3.37)     | 1,125 | 351 (31.2) | 1.69 | 1.30, 2.20 | <0.001 |



Ile, Leu and Val were analyzed in separate regression models. Model 1: adjusted for age; Model 2: adjusted for ethnicity, education, urban residents, diagnosed T2DM, physical activity, smoking and alcohol drinking in addition to Model 1; Model 3: adjusted for energy, carbohydrate, fat, protein, and salt intake in addition to Model 2. The interaction by gender was only estimated for BCAAs, not for any other confounder. **Abbreviations:** BCAA: branched-chain amino acid; HR: hazard ratio; 95% CI: 95% confidence interval; Ile: isoleucine; Leu: leucine; Val: valine.

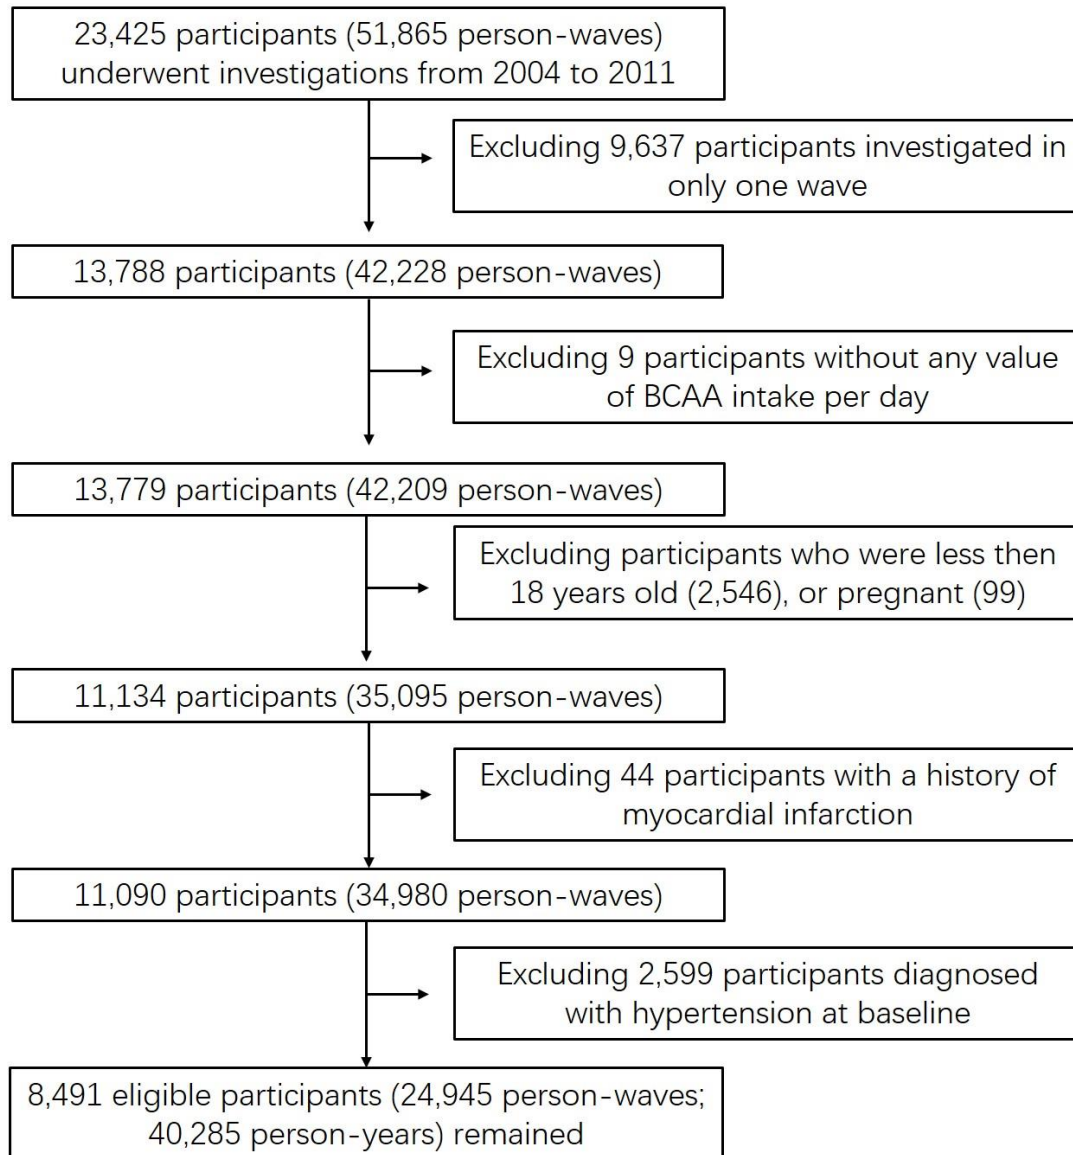

**Figure S1.** Flow chart of the prospective longitudinal analysis

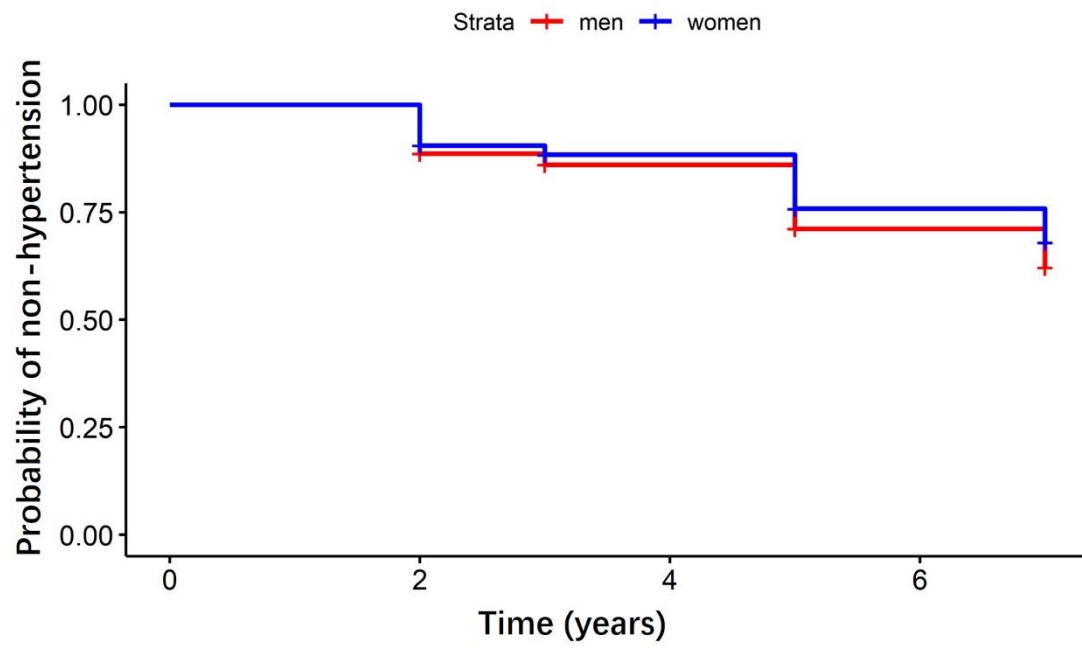

**Figure S2.** Kaplan-Meier curve of the probability of non-hypertension in men and women

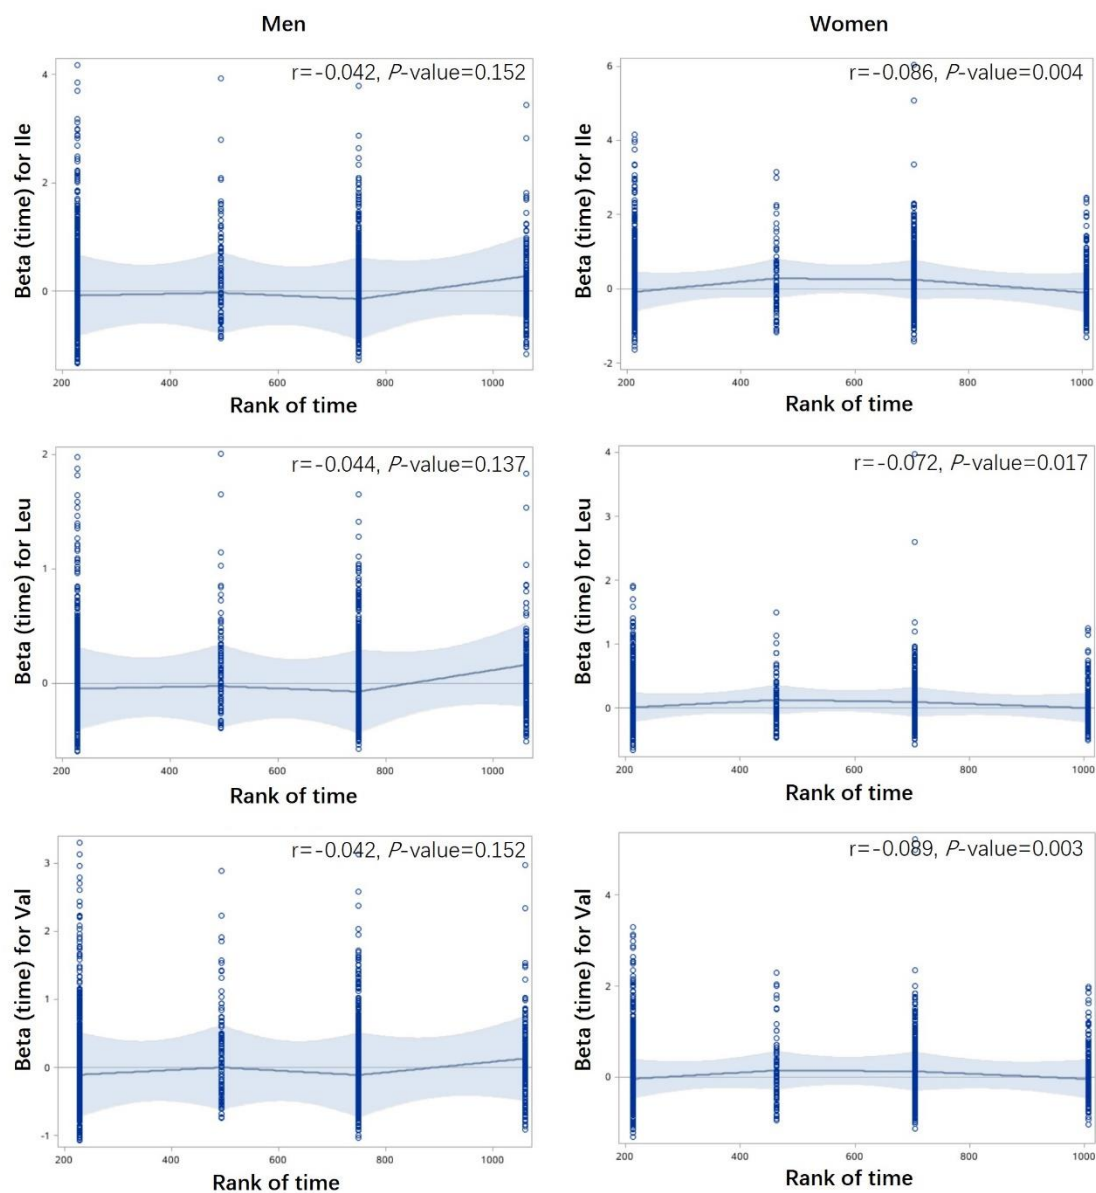

**Figure S3.** Diagnostic of proportional hazards assumption based on weighted Schoenfeld Residual. The beta (time) was the time-varying coefficient calculated based on weighted Schoenfeld residual and regression coefficient of COX regression models for each individual BCAA. The Pearson correlation was performed to estimate the relationship between residual and time rank. Correlation coefficients and relevant *P*-values were given.
